# Supplementary material for: Implementation of a satellite-based tool for the quantification of CH 4 emissions over Europe (AUMIA v1.0) – Part 1: forward modelling evaluation against near-surface and satellite data
Source: Copernicus journal article supplement (doi:10.5194/gmd-16-6413-2023), 2023-11-10
Supplement: Supplementary file 1 [file gmd-16-6413-2023-supplement.pdf]

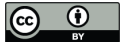

*Supplement of*

**Implementation of a satellite-based tool for the quantification of CH<sub>4</sub> emissions over Europe (AUMIA v1.0) – Part 1: forward modelling evaluation against near-surface and satellite data**

**Angel Liduvino Vara-Vela et al.**

*Correspondence to:* Angel Liduvino Vara-Vela ([angel@geo.au.dk](mailto:angel@geo.au.dk))

The copyright of individual parts of the supplement might differ from the article licence.

1 Supplement

2  
3  
4  
5  
6  
7  
8  
9  
10  
11  
12  
13  
14  
15  
16  
17  
18  
19  
20  
21  
22  
23  
24  
25  
26  
27  
28  
29  
30  
31  
32  
33  
34  
35  
36  
37  
38  
39  
40  
1

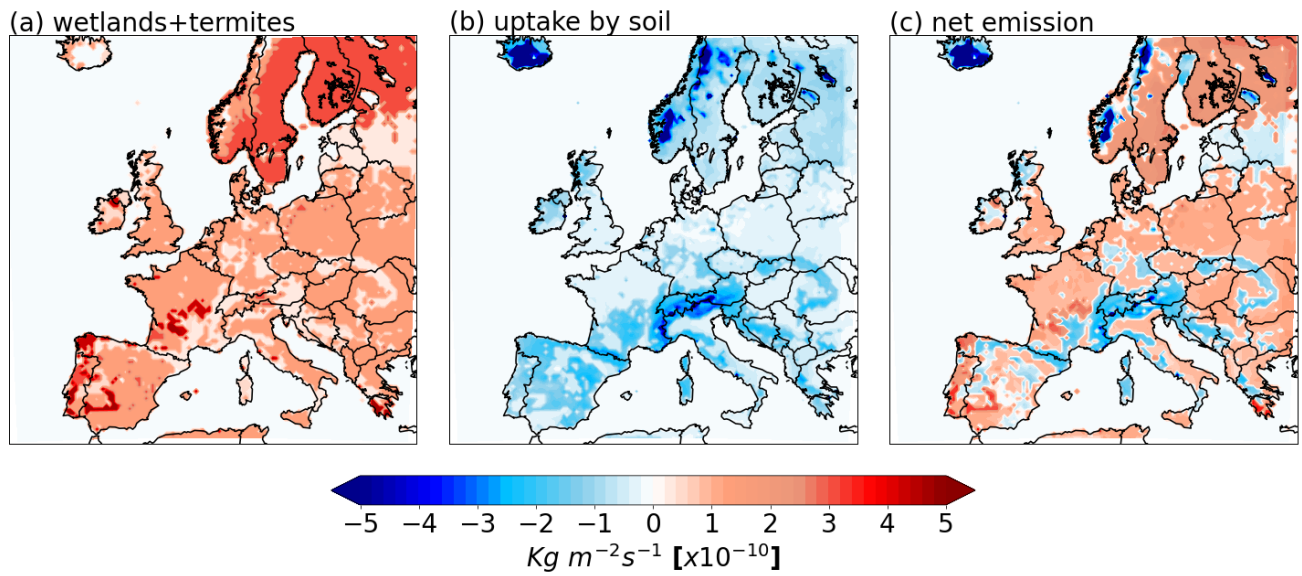

**Figure S1.** Temporal mean spatial distribution of  $\text{CH}_4$  emission rate for natural sources (wetlands and termites) and sinks (soil uptake) in the 30 km modeling domain, averaged over the period from May 1 to 31, 2018..

41  
42  
43  
44  
45  
46  
47  
48  
49  
50  
51  
52  
53  
54  
55  
56  
57  
58  
59  
60  
61  
62  
63  
64  
65  
66  
67  
68  
69  
70  
71  
72  
73  
74  
75  
76  
77  
78  
79  
80  
2

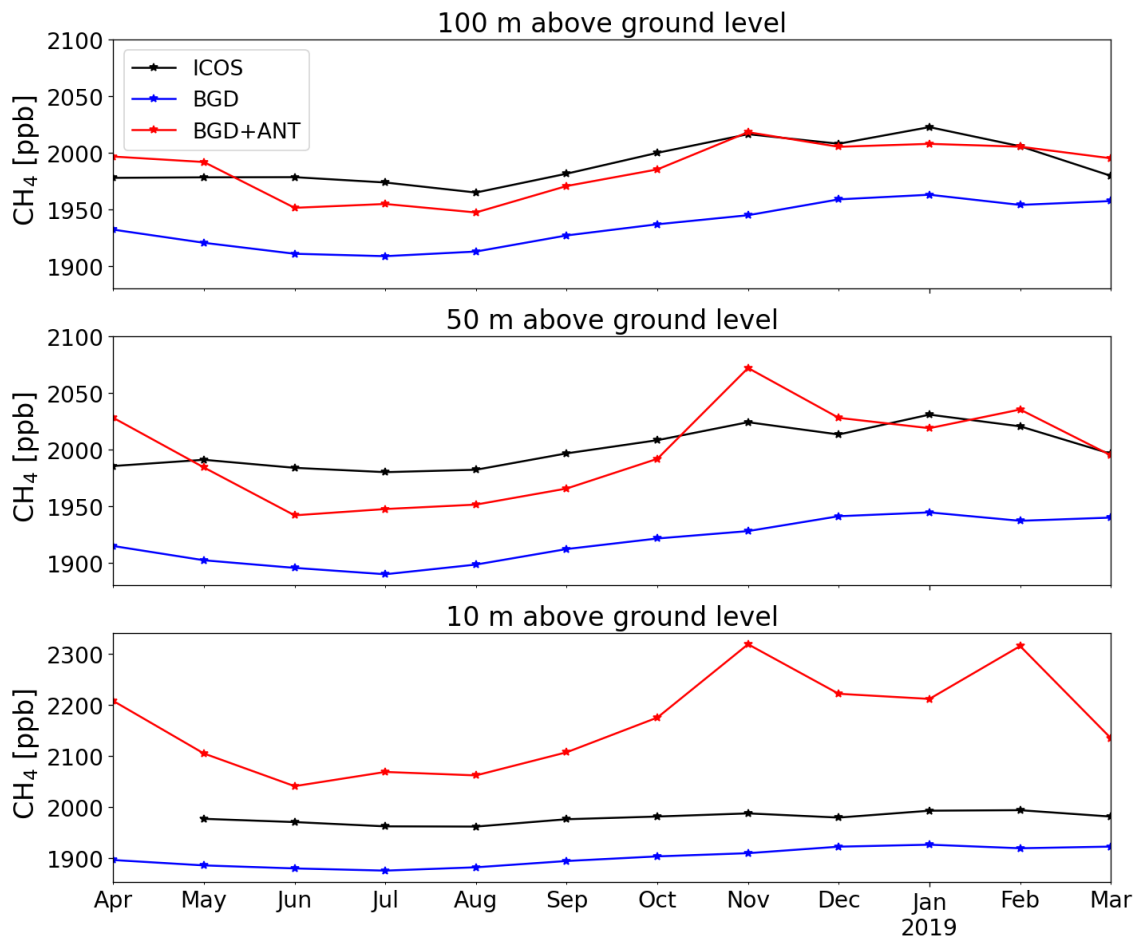

**Figure S2.** Monthly mean concentrations of observed (ICOS) and simulated (BGD and BGD+ANT) CH<sub>4</sub> at 10, 50 and 100 m above ground level for all stations. BGD and ANT represent the simulated concentrations from background and anthropogenic sources, respectively. The mean concentrations were computed based on quality-controlled ICOS CH<sub>4</sub> data. Contributions from natural sources (wetlands and termites) and biomass burning were not relevant during the study period.

81  
82  
83  
84  
85  
86  
87  
88  
89  
90  
91  
92  
93  
94  
95  
96  
97  
98  
99  
100  
101  
102  
103  
104  
105  
106  
107  
108  
109  
110  
111  
112  
113  
114  
115  
116  
117  
118  
119  
120

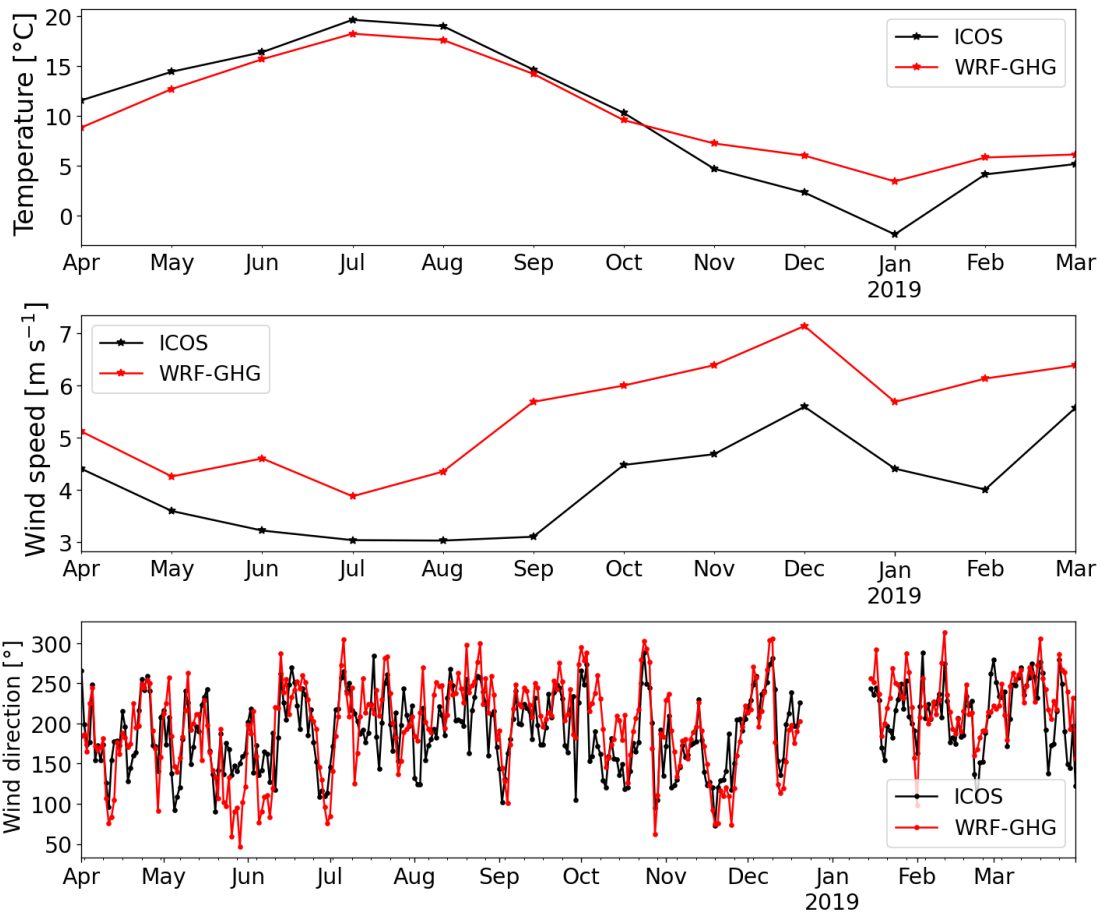

**Figure S3.** Monthly (and daily) mean values of observed and simulated temperature, wind speed (and wind direction) at 10 m above ground level. The mean concentrations were computed based on quality-controlled ICOS data.

121  
 122  
 123  
 124  
 125  
 126  
 127  
 128  
 129  
 130  
 131  
 132  
 133  
 134  
 135  
 136  
 137  
 138  
 139  
 140  
 141  
 142  
 143  
 144  
 145  
 146  
 147  
 148  
 149  
 150  
 151  
 152  
 153  
 154  
 155  
 156  
 157  
 158  
 159  
 160

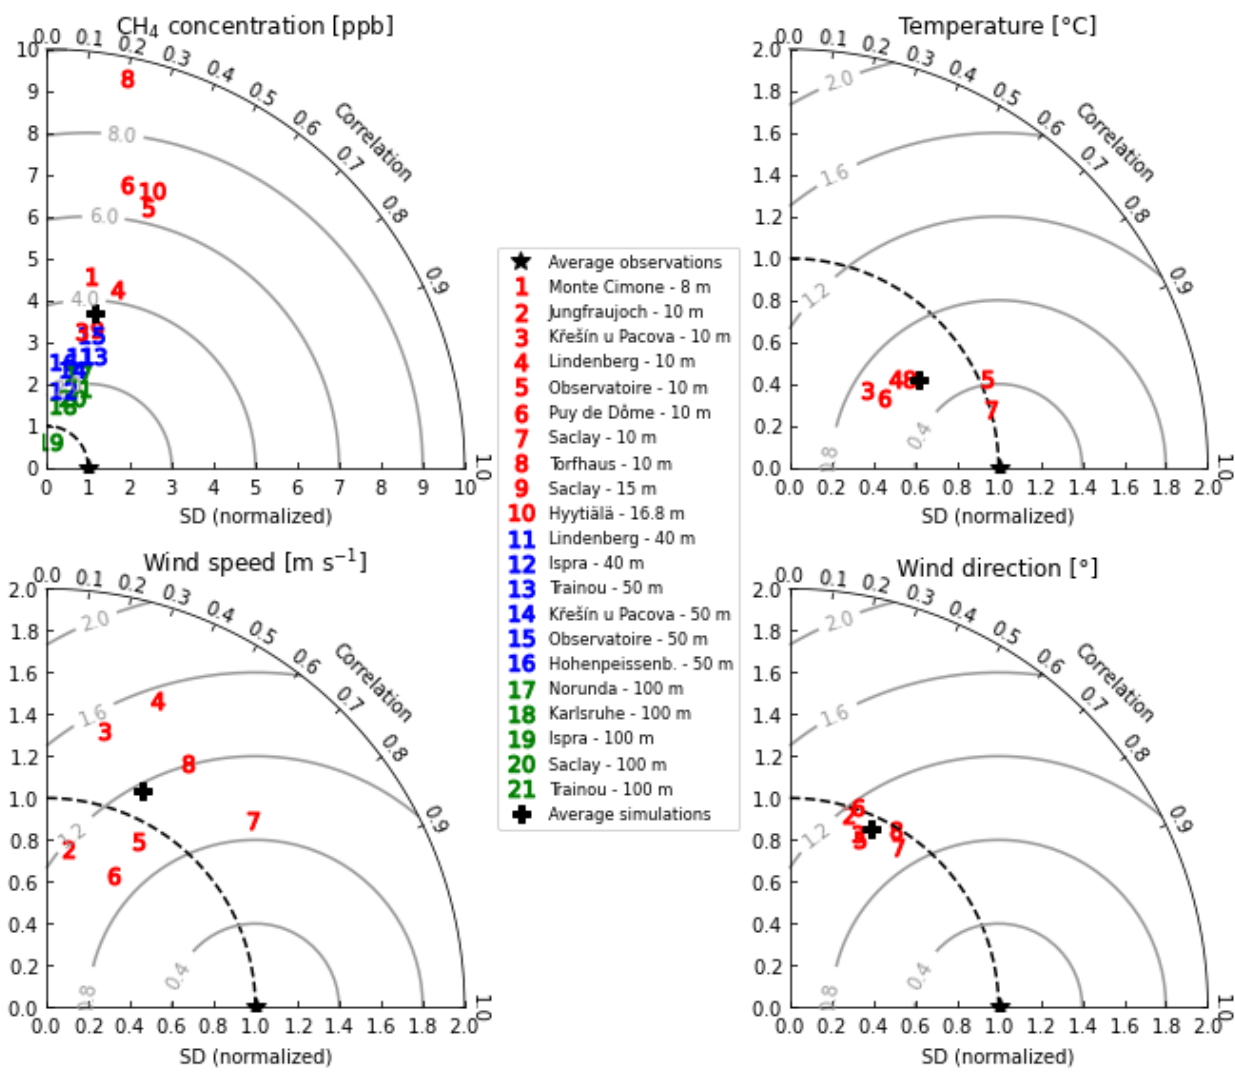

**Figure S4.** Correlation coefficients and standard deviation (SD) model to observation ratios for CH<sub>4</sub> concentrations, temperature, wind speed and wind direction. The numbers in red, blue and green represent ICOS stations with data with sampling heights between 8.0–16.8 m, 40–50 m, and 100 m, respectively (see Table 3 for station details).

161  
162  
163  
164  
165  
166  
167  
168  
169  
170

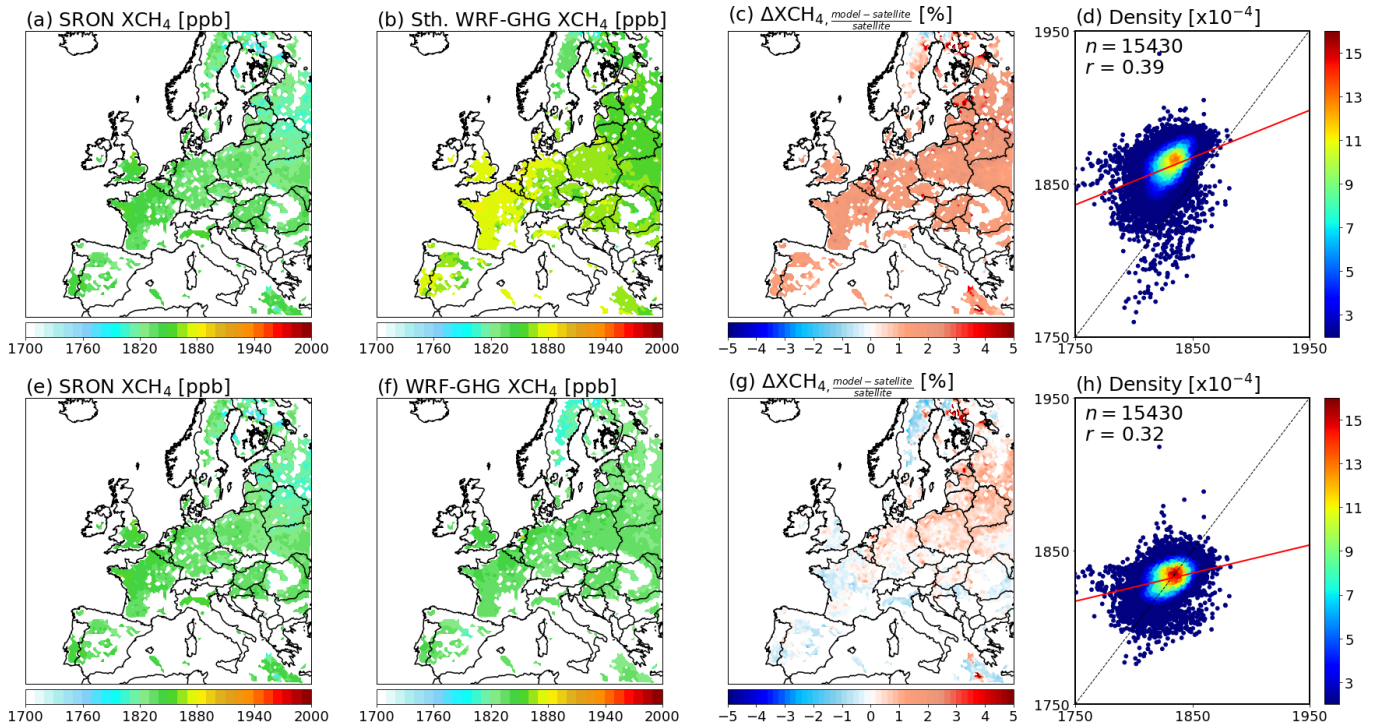

172 **Figure S5.** Temporal mean spatial distributions of XCH<sub>4</sub> concentration from SRON RemoTeC-S5P (panels a and e) and WRF-  
173 GHG estimates with and without smoothing (panels b and f, respectively), along with their relative differences (panels c and g),  
174 averaged over the period from April 1 to April 30, 2018.

175  
176  
177  
178  
179  
180  
181  
182  
183

184  
185  
186  
187  
188  
189  
190  
191  
192

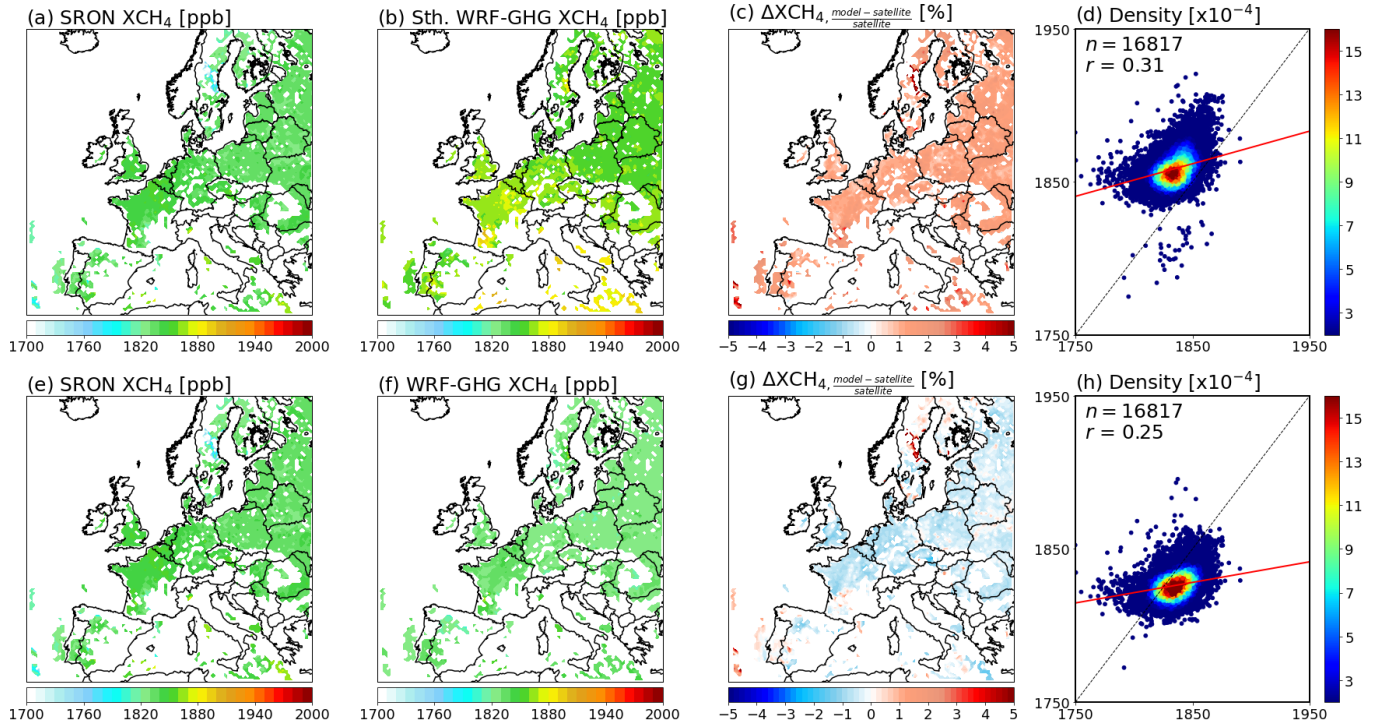

194 **Figure S6.** Temporal mean spatial distributions of XCH<sub>4</sub> concentration from SRON RemoTeC-S5P (panels a and e) and WRF-  
195 GHG estimates with and without smoothing (panels b and f, respectively), along with their relative differences (panels c and g),  
196 averaged over the period from May 1 to May 31, 2018.

197  
198  
199  
200  
201  
202  
203  
204  
205  
206

207  
208  
209  
210  
211  
212  
213  
214  
215

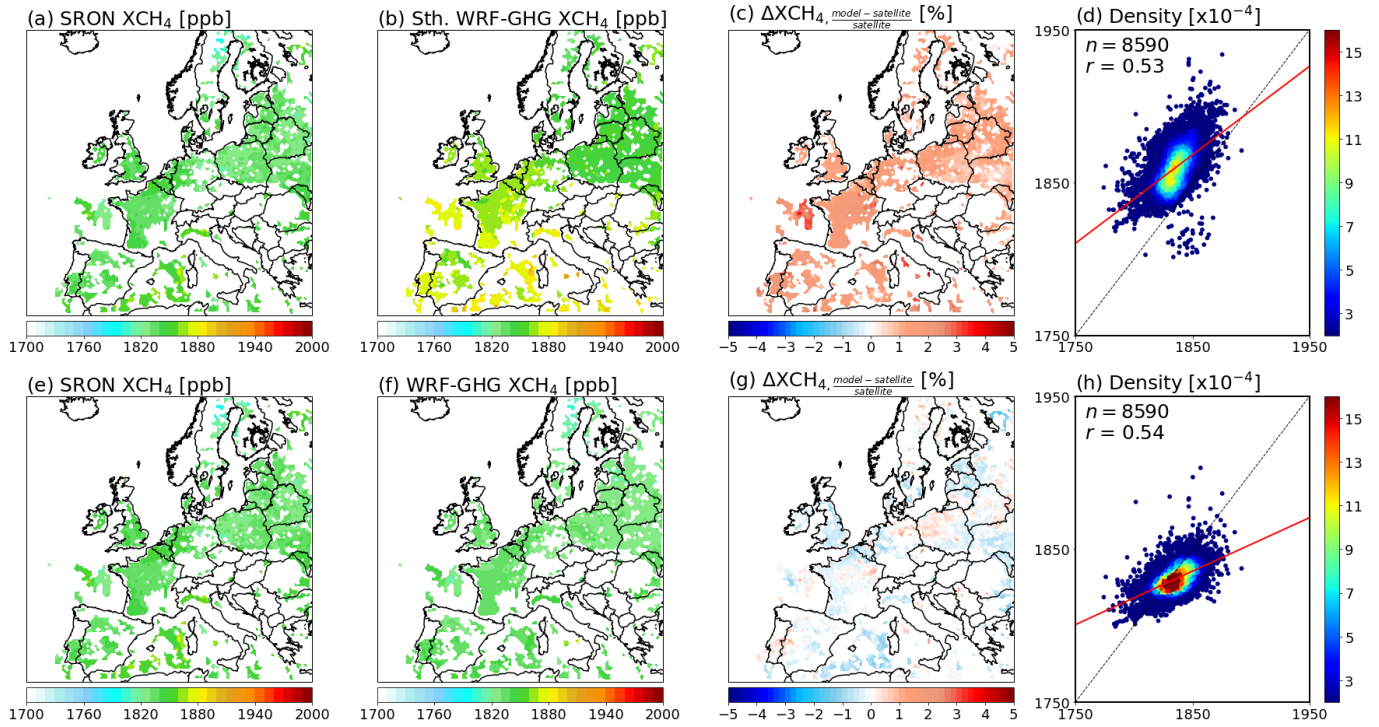

217 **Figure S7.** Temporal mean spatial distributions of XCH<sub>4</sub> concentration from SRON RemoTeC-S5P (panels a and e) and WRF-  
218 GHG estimates with and without smoothing (panels b and f, respectively), along with their relative differences (panels c and g),  
219 averaged over the period from June 1 to June 30, 2018.

220  
221  
222  
223  
224  
225  
226  
227  
228  
229



230  
231  
232  
233  
234  
235  
236  
237  
238  
239  
240

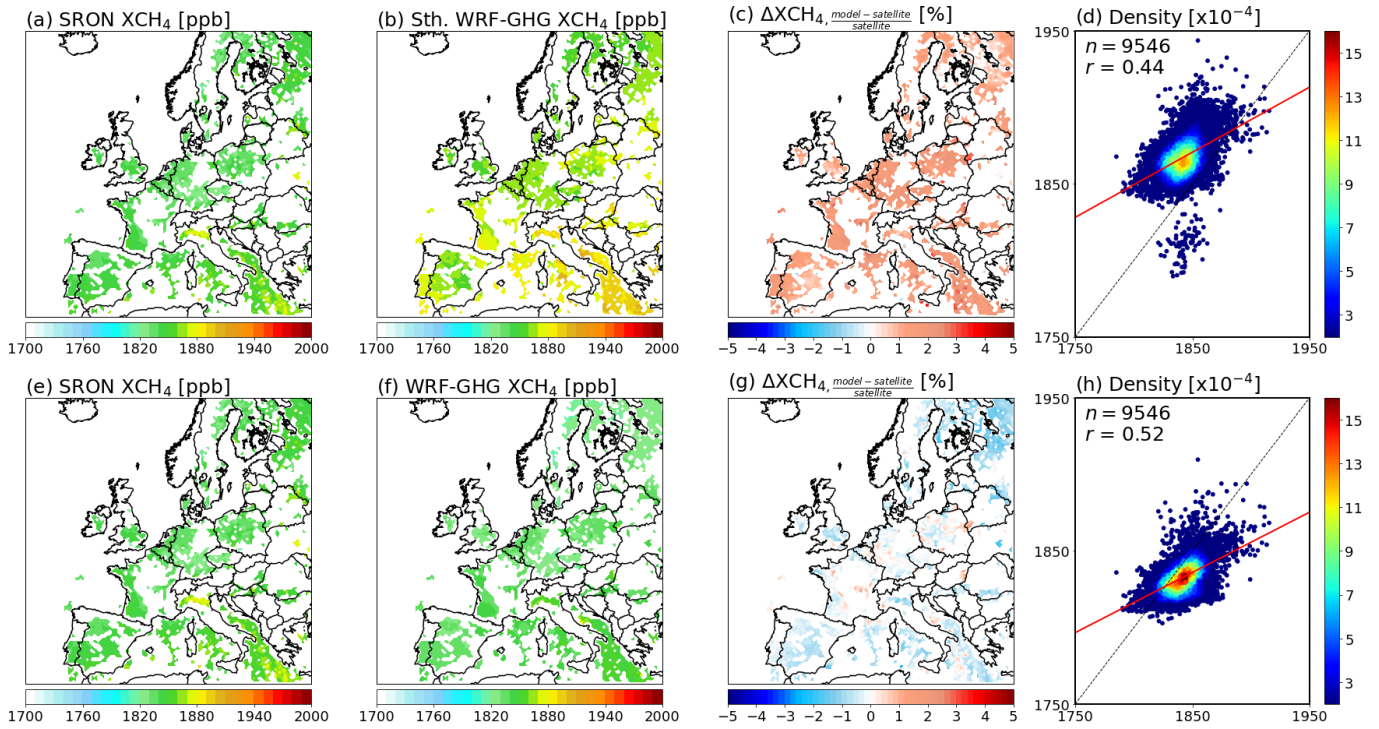

242 **Figure S8.** Temporal mean spatial distributions of XCH<sub>4</sub> concentration from SRON RemoTeC-S5P (panels a and e) and WRF-  
243 GHG estimates with and without smoothing (panels b and f, respectively), along with their relative differences (panels c and g),  
244 averaged over the period from July 1 to July 31, 2018.

245  
246  
247  
248  
249  
250  
251  
252

253  
254  
255  
256  
257  
258  
259  
260  
261  
262

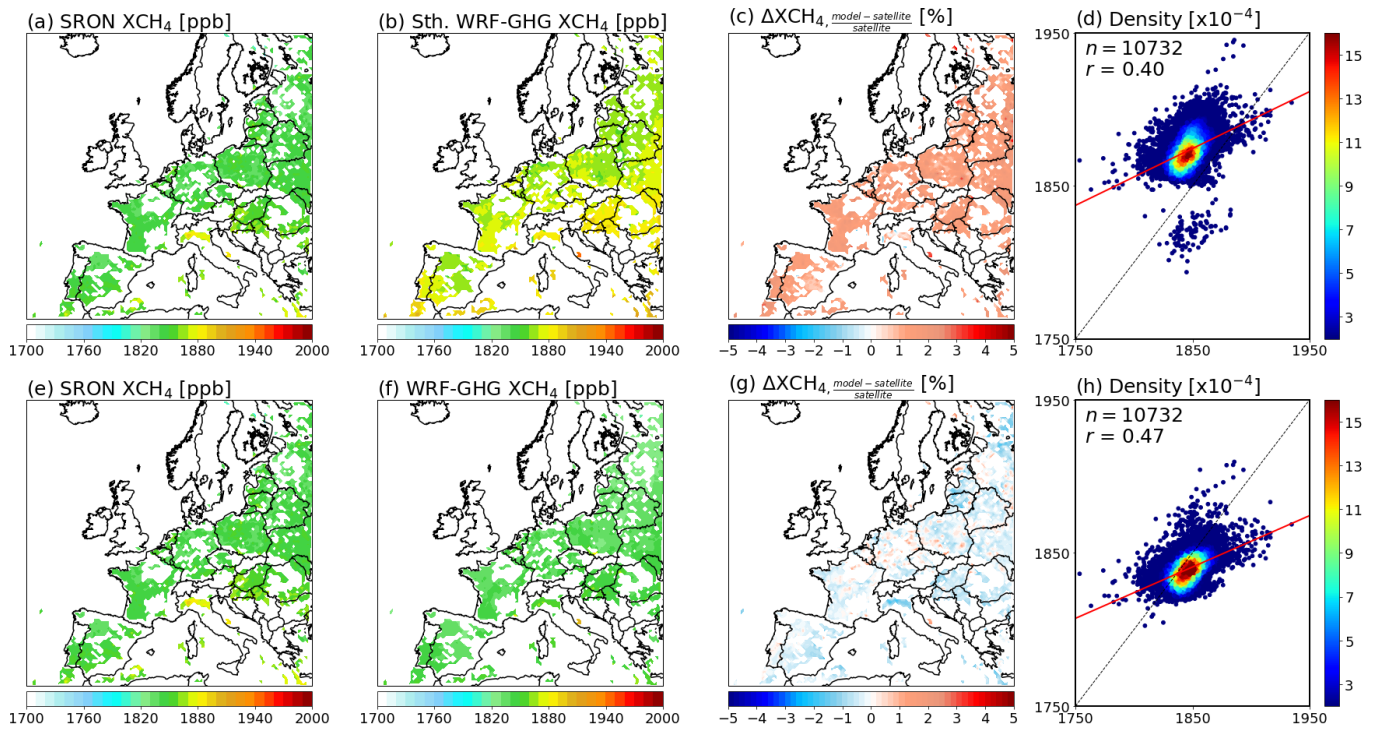

264 **Figure S9.** Temporal mean spatial distributions of XCH<sub>4</sub> concentration from SRON RemoTeC-S5P (panels a and e) and WRF-  
265 GHG estimates with and without smoothing (panels b and f, respectively), along with their relative differences (panels c and g),  
266 averaged over the period from August 1 to August 31, 2018.

267  
268  
269  
270  
271  
272  
273  
274  
275

276  
277  
278  
279  
280  
281  
282  
283  
284  
285  
286

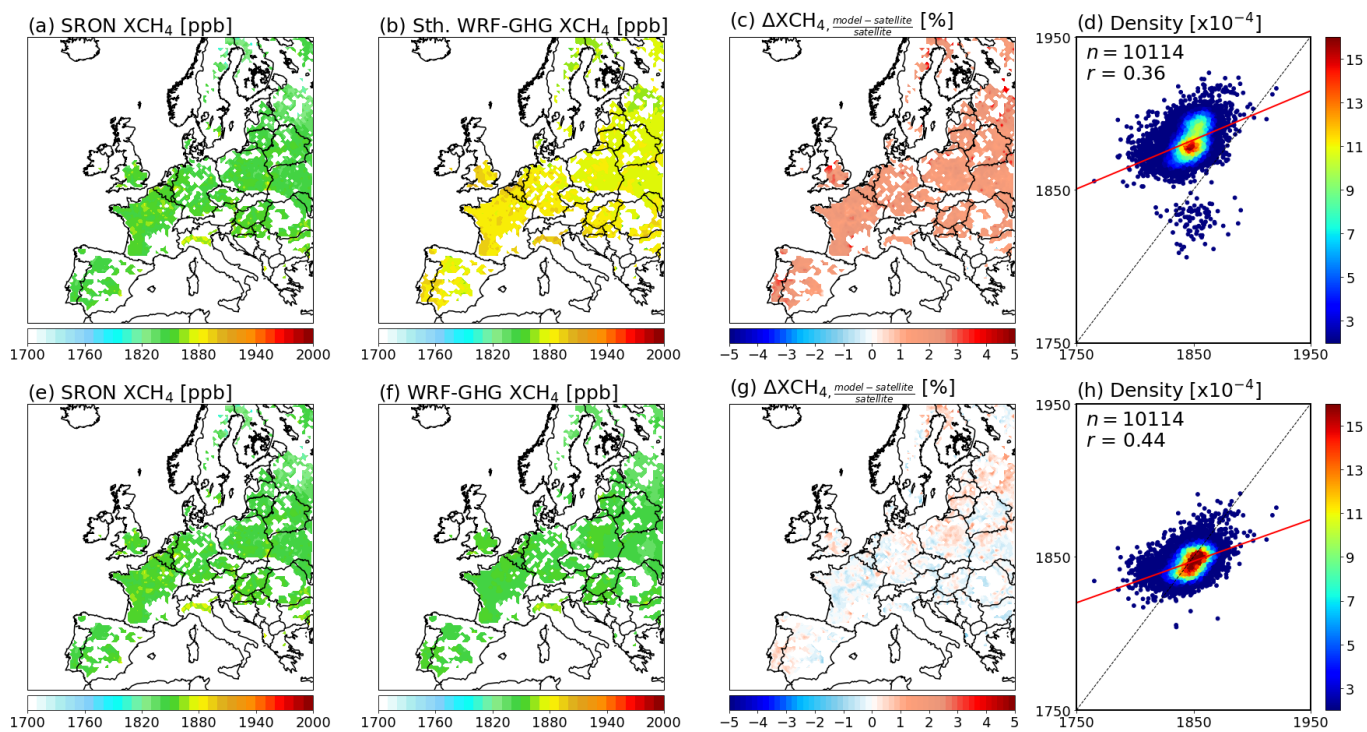

288 **Figure S10.** Temporal mean spatial distributions of XCH<sub>4</sub> concentration from SRON RemoTeC-S5P (panels a and e) and  
289 WRF-GHG estimates with and without smoothing (panels b and f, respectively), along with their relative differences (panels c  
290 and g), averaged over the period from September 1 to September 30, 2018.

291  
292  
293  
294  
295  
296  
297  
298

299  
300  
301  
302  
303  
304  
305  
306  
307  
308

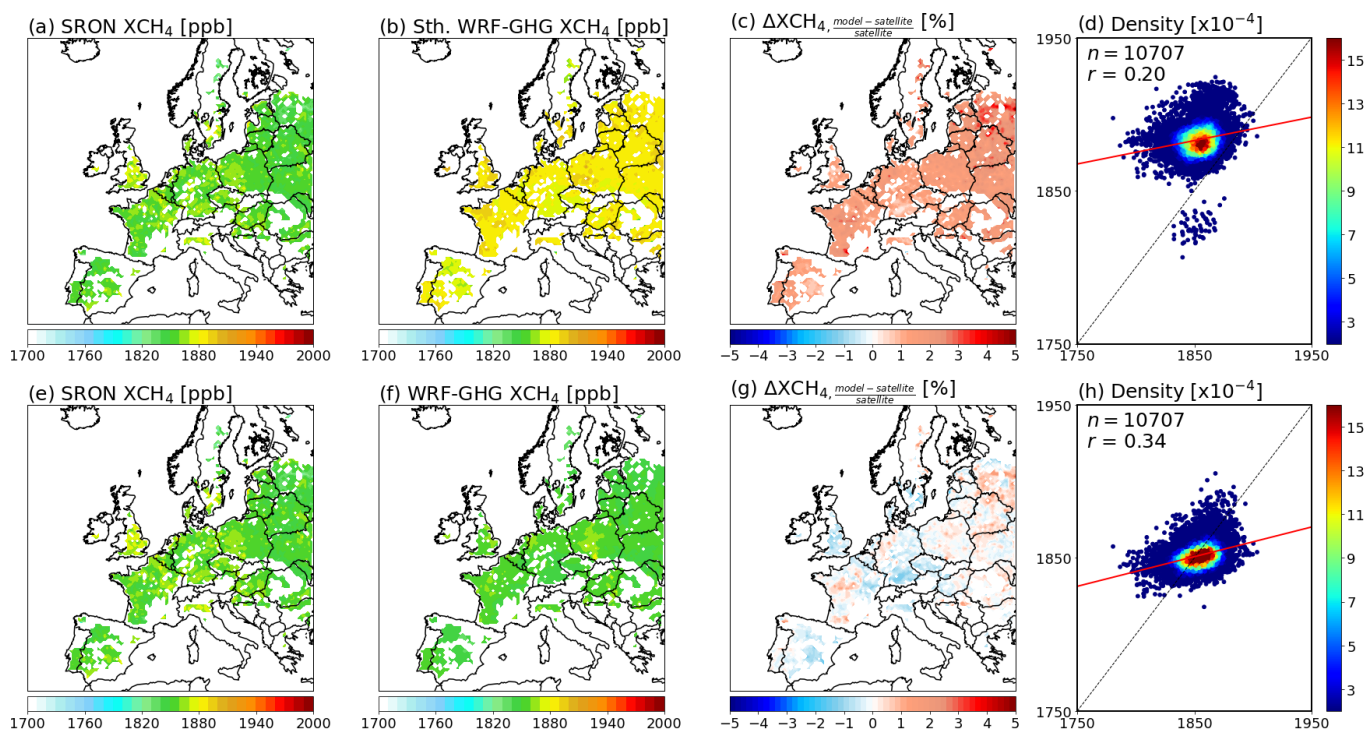

310 **Figure S11.** Temporal mean spatial distributions of XCH<sub>4</sub> concentration from SRON RemoTeC-S5P (panels a and e) and WRF-  
311 GHG estimates with and without smoothing (panels b and f, respectively), along with their relative differences (panels c and g),  
312 averaged over the period from October 1 to October 31, 2018.

313  
314  
315  
316  
317  
318  
319  
320  
321

322  
323  
324  
325  
326  
327  
328  
329  
330  
331  
332

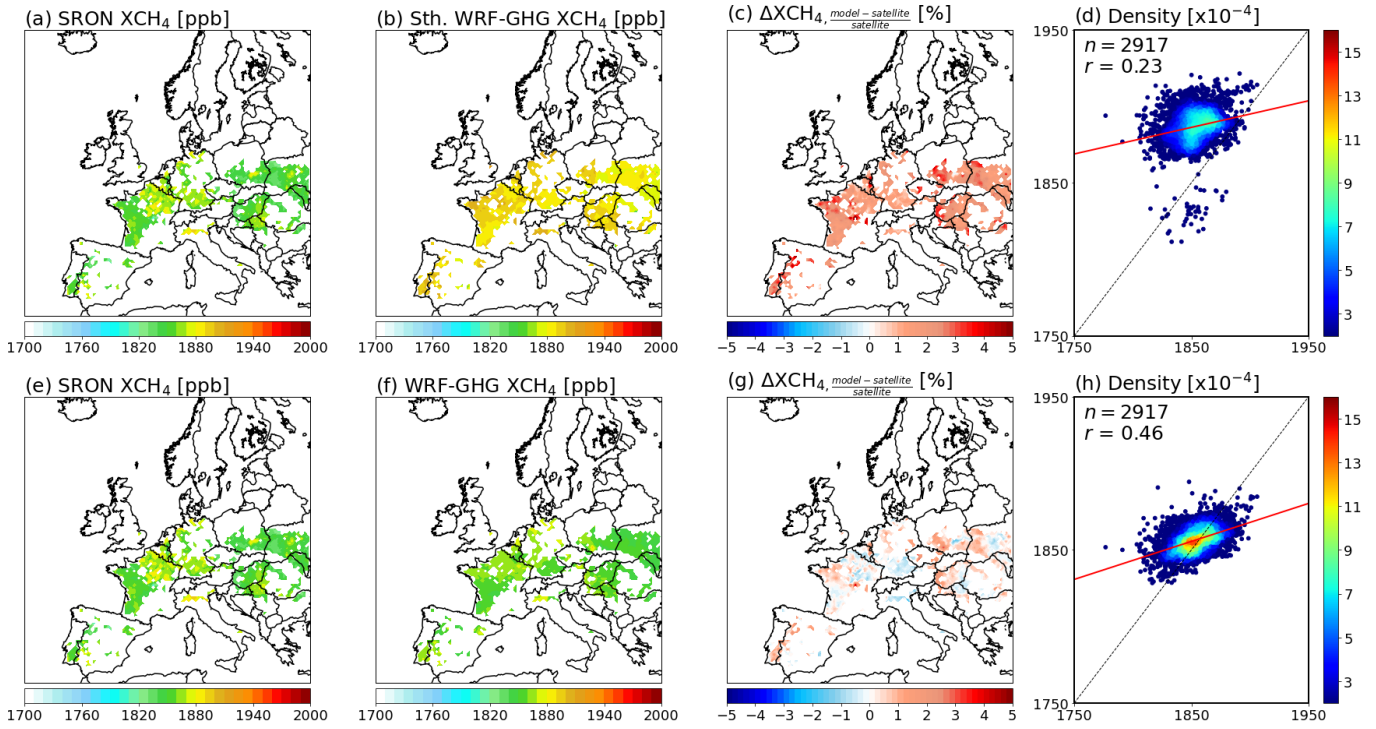

334 **Figure S12.** Temporal mean spatial distributions of XCH<sub>4</sub> concentration from SRON RemoTeC-S5P (panels a and e) and  
335 WRF-GHG estimates with and without smoothing (panels b and f, respectively), along with their relative differences (panels c  
336 and g), averaged over the period from November 1 to November 30, 2018.

337  
338  
339  
340  
341  
342  
343  
344

345  
346  
347  
348  
349  
350  
351  
352  
353  
354  
355

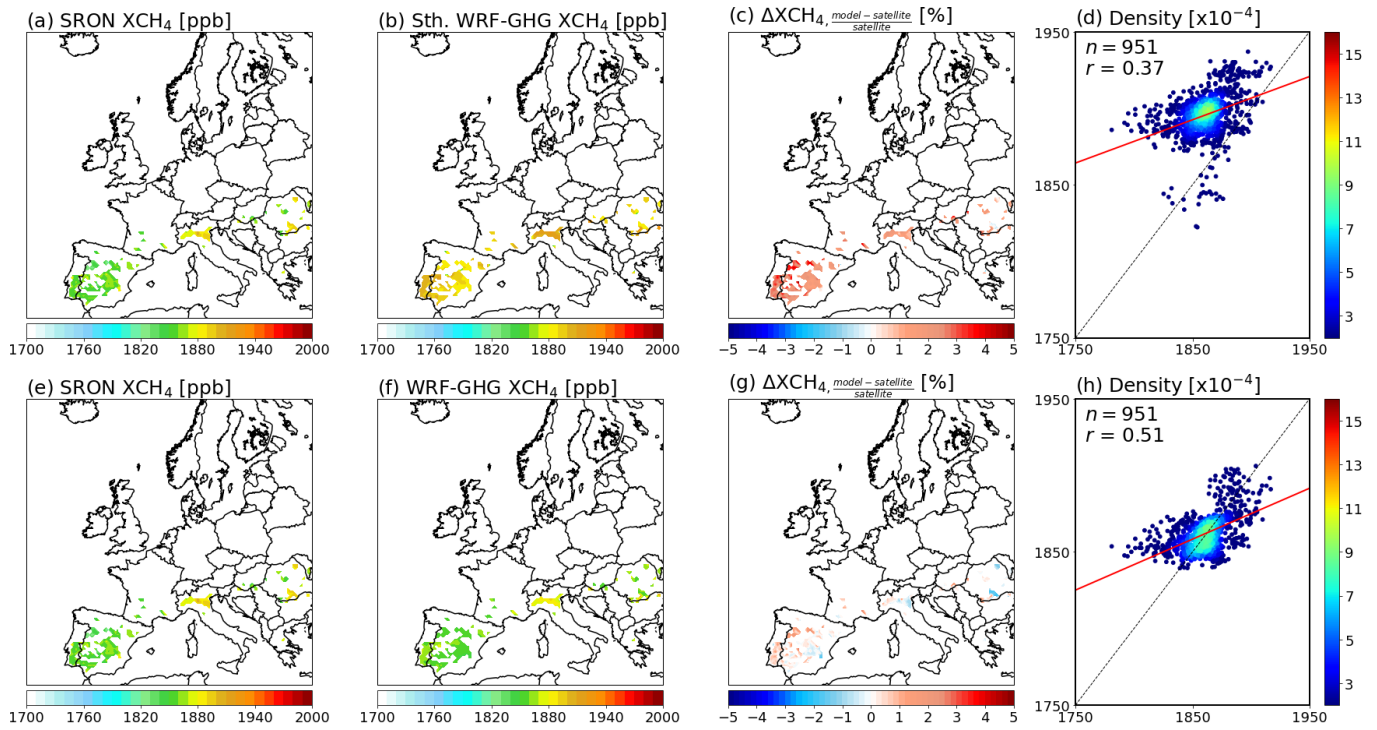

357 **Figure S13.** Temporal mean spatial distributions of XCH<sub>4</sub> concentration from SRON RemoTeC-S5P (panels a and e) and  
358 WRF-GHG estimates with and without smoothing (panels b and f, respectively), along with their relative differences (panels c  
359 and g), averaged over the period from December 1 to December 20, 2018.

360  
361  
362  
363  
364  
365  
366  
367

368  
369  
370  
371  
372  
373  
374  
375  
376  
377  
378  
379

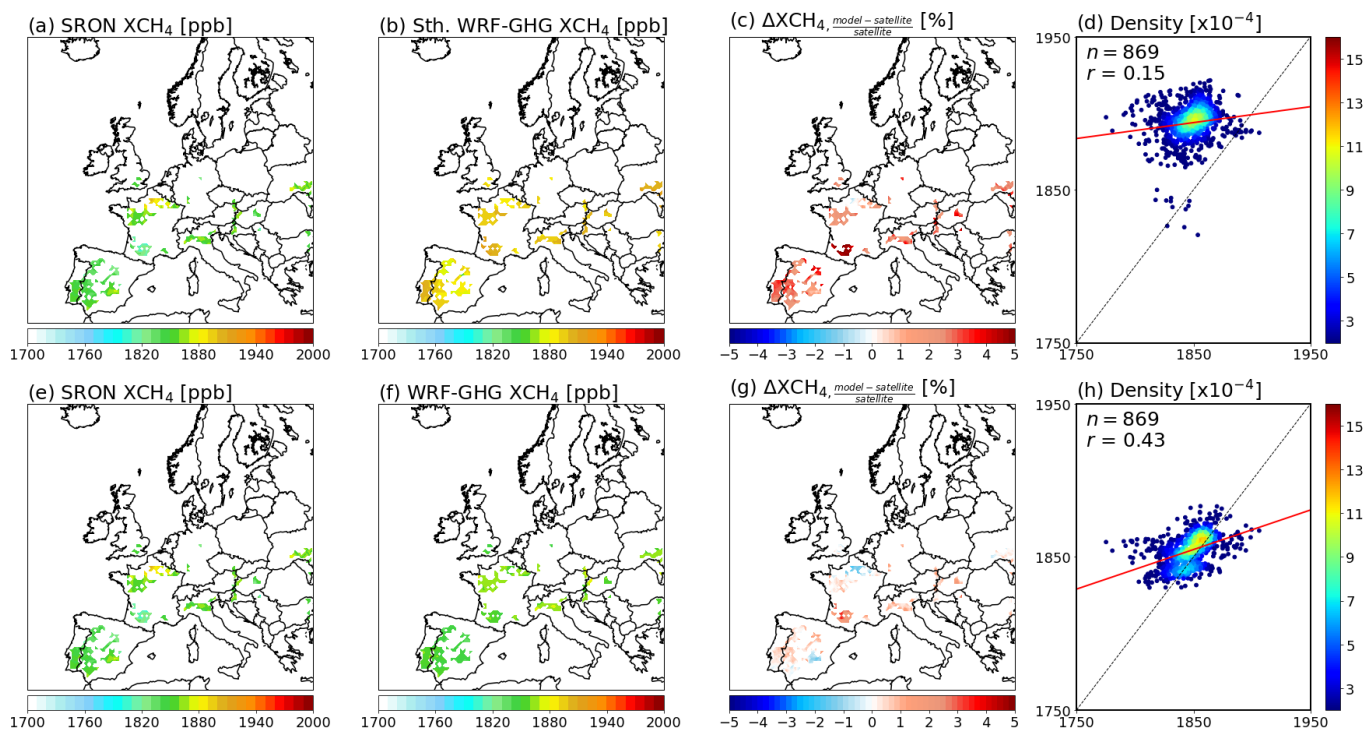

381 **Figure S14.** Temporal mean spatial distributions of XCH<sub>4</sub> concentration from SRON RemoTeC-S5P (panels a and e) and  
382 WRF-GHG estimates with and without smoothing (panels b and f, respectively), along with their relative differences (panels c  
383 and g), averaged over the period from January 15 to January 31, 2019.

384  
385  
386  
387  
388  
389  
390

391  
392  
393  
394  
395  
396  
397  
398  
399  
400  
401

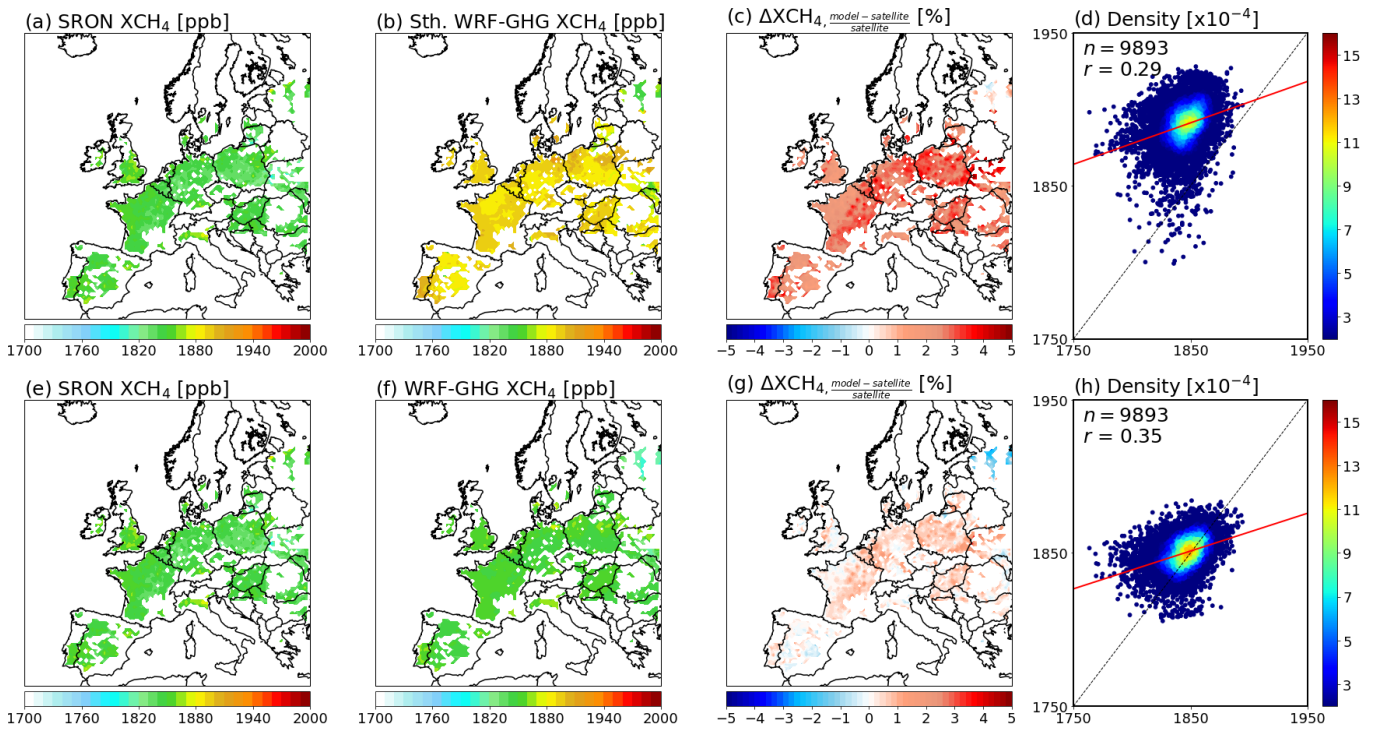

403 **Figure S15.** Temporal mean spatial distributions of XCH<sub>4</sub> concentration from SRON RemoTeC-S5P (panels a and e) and  
404 WRF-GHG estimates with and without smoothing (panels b and f, respectively), along with their relative differences (panels c  
405 and g), averaged over the period from February 1 to February 28, 2019.

406  
407  
408  
409  
410  
411  
412  
413



414  
415  
416  
417  
418  
419  
420  
421  
422  
423  
424  
425

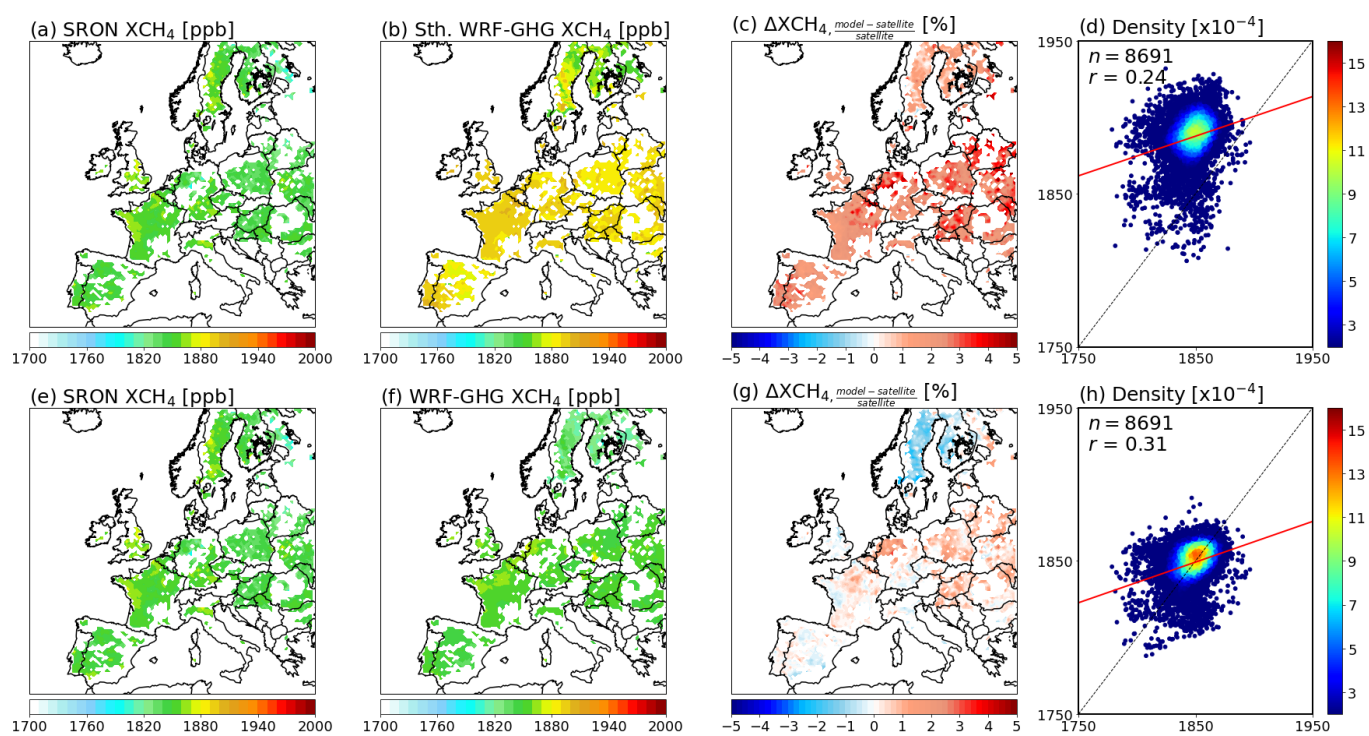

427 **Figure S16.** Temporal mean spatial distributions of XCH<sub>4</sub> concentration from SRON RemoTeC-S5P (panels a and e) and  
428 WRF-GHG estimates with and without smoothing (panels b and f, respectively), along with their relative differences (panels c  
429 and g), averaged over the period from March 1 to March 31, 2019.

430  
431  
432  
433  
434  
435  
436
